# Supplementary material for: Deep learning-aided decision support for diagnosis of skin disease across skin tones
Source: Springer Nature journal article supplement (doi:10.1038/s41591-023-02728-3), 2024-02-01
Supplement: 41591_2023_2728_MOESM1_ESM.pdf [file 41591_2023_2728_MOESM1_ESM.pdf]

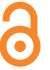

---

# Deep learning-aided decision support for diagnosis of skin disease across skin tones

---

In the format provided by the authors and unedited

# Supplemental Information

Diagnosing Skin Conditions

diagnosing-diagnosis.media.mit.edu/start

About Instructions Consent

## Diagnosing Diagnosis

### Welcome to the Diagnosis Challenge

This is an MIT research project. We will first ask 7 brief survey questions. Then, we will show you images of skin conditions and ask you to try to diagnose the skin conditions. After you diagnose conditions in 10 images, we will show you how you perform relative to other healthcare providers. All submissions are collected anonymously for research purposes. For questions, please contact dermatology-diagnosis@mit.edu. Participation is voluntary.

### Survey

How would you describe yourself professionally?

----Please select one----

What country do you currently live in?

----Please select one----

How many years have you practiced medicine?

----Please select one----

How would you describe the distribution of your patients's skin colors?

----Please select one----

How often do you have difficulty diagnosing skin conditions in white patients?

----Please select one----

How often do you have difficulty diagnosing skin conditions in patients with skin of color (non-white patients)?

----Please select one----

Do you feel you received sufficient training for diagnosing skin conditions in patients with skin of color (non-white patients)?

----Please select one----

Submit

**Supplementary Information Figure 1: Welcome Page.** Screenshot from the Diagnosing Diagnosis experiment website showing the welcome landing page

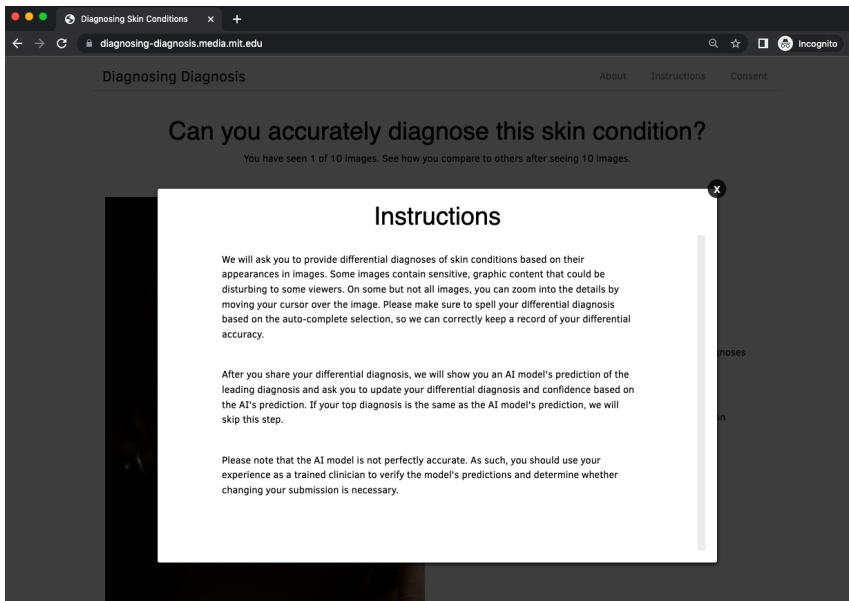

**Supplementary Information Figure 2: Instructions Page.** Screenshot from the Diagnosing Diagnosis experiment website showing the instructions.

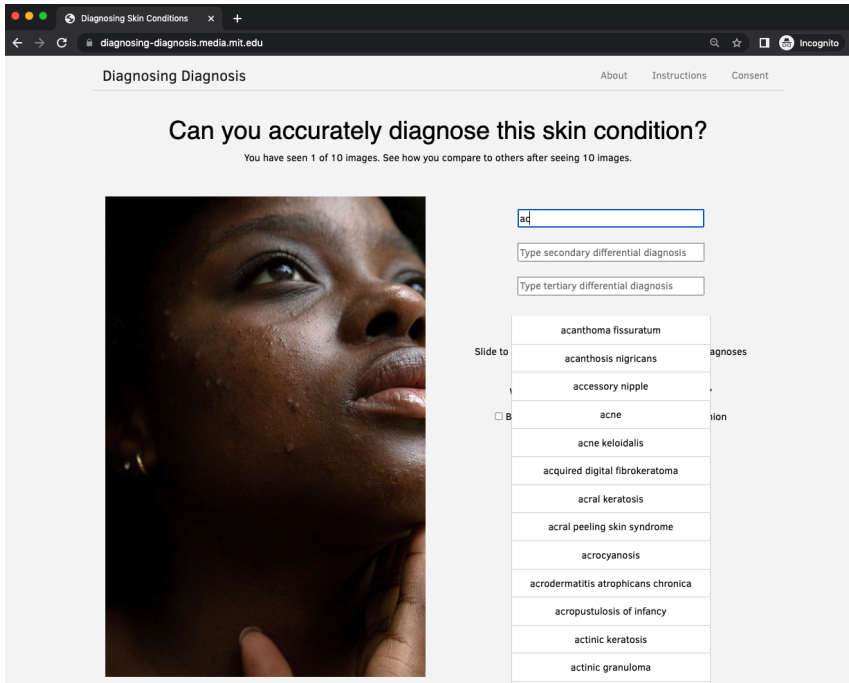

**Supplementary Information Figure 3: Differential Diagnosis Page with Predictive Text.** Screenshot from the Diagnosing Diagnosis experiment website showing predictive text for selecting diagnoses.



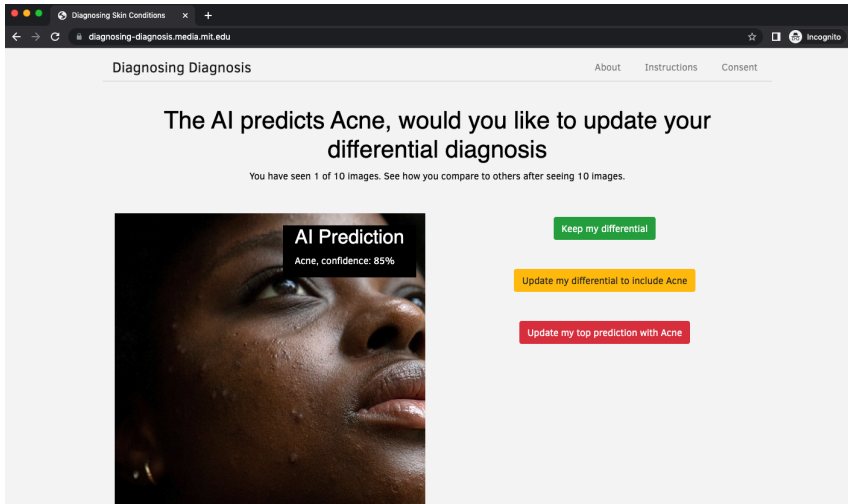

**Supplementary Information Figure 4: Decision Support Page.** Screenshot from the Diagnosing Diagnosis experiment website showing the DLS suggestion. Participants are randomly assigned to either see the three options in the order presented or the reverse order with “Update my top prediction...” on top, “Update my differential” in the middle, and “Keep my differential” on the bottom.

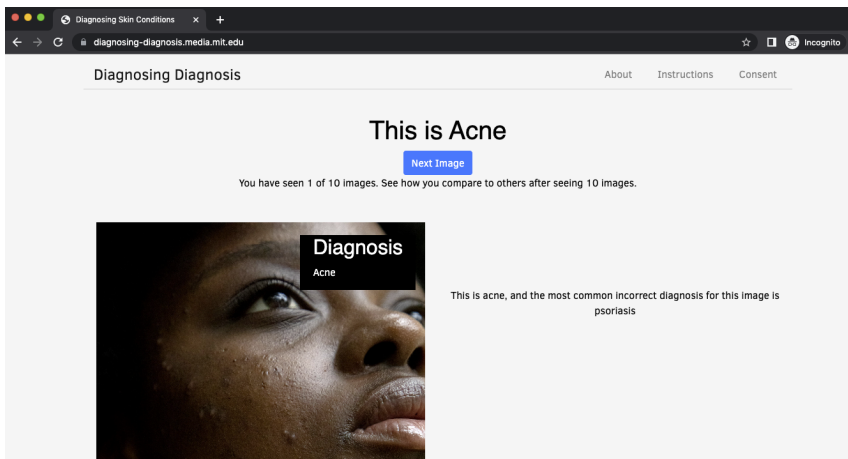

**Supplementary Information Figure 5: Feedback Page.** Screenshot from the Diagnosing Diagnosis experiment website showing the feedback based on the original label.

| <i>Dependent variable: BCD Top-1 Accuracy</i> |                   |                   |                   |                    |
|-----------------------------------------------|-------------------|-------------------|-------------------|--------------------|
|                                               | R1                | R2                | R3                | R4                 |
|                                               | (1)               | (2)               | (3)               | (4)                |
| Constant                                      | 0.29***<br>(0.01) | 0.32***<br>(0.02) | 0.28***<br>(0.01) | 0.29***<br>(0.01)  |
| Fitzpatrick Skin Type 5 and 6                 | -0.05*<br>(0.02)  | -0.06*<br>(0.03)  | -0.04*<br>(0.02)  | -0.05***<br>(0.01) |
| Observations                                  | 2,660             | 1,215             | 2,855             | 4,976              |
| Number of Dermatologists                      | 296               | 135               | 374               | 377                |
| Number of Images                              | 363               | 363               | 363               | 363                |
| $R^2$                                         | 0.00              | 0.00              | 0.00              | 0.00               |

*Note:*

\* $p < 0.05$ ; \*\* $p < 0.01$ ; \*\*\* $p < 0.001$

**Supplementary Information Table 1: Robustness Check for Regression of Patients' Fitzpatrick Skin Type on BCD Physicians' Top-1 Accuracy.** Robustness check for top-1 accuracy disparities across skin tone based on alternative inclusion criteria for board-certified dermatologists. This table shows ordinary least squares regressions with robust standard errors clustered on physician participants. The dependent variable is top-1 accuracy. Column (1) includes the first 10 differential diagnoses of images by participants who passed the attention check and completed at least 10 differential diagnoses of images (2) includes the subset of participants from (1) who live in the United States (3) includes the subset of participants from (1) and also includes participants who provided fewer than 10 differential diagnoses of images, and (4) includes all responses of all physician participants who pass the attention check. The coefficients represent the change in the dependent variable for a one-unit change in the independent variable while holding everything else constant. The numbers in parentheses are standard errors indicating the variability of coefficient estimates. \*, \*\*, and \*\*\* indicates the p-value from the ordinary least squares regression is less than 0.05, 0.01, and 0.001.

| <i>Dependent variable: BCD Top-3 Accuracy</i> |                   |                   |                   |                   |
|-----------------------------------------------|-------------------|-------------------|-------------------|-------------------|
|                                               | R1                | R2                | R3                | R4                |
|                                               | (1)               | (2)               | (3)               | (4)               |
| Constant                                      | 0.40***<br>(0.01) | 0.43***<br>(0.02) | 0.38***<br>(0.01) | 0.38***<br>(0.02) |
| Fitzpatrick Skin Type 5 and 6                 | -0.03<br>(0.02)   | -0.03<br>(0.03)   | -0.03<br>(0.02)   | -0.03*<br>(0.01)  |
| Observations                                  | 2,660             | 1,215             | 2,855             | 4,976             |
| Number of Dermatologists                      | 296               | 135               | 374               | 377               |
| Number of Images                              | 363               | 363               | 363               | 363               |
| $R^2$                                         | 0.00              | 0.00              | 0.00              | 0.00              |

*Note:*

\* $p < 0.05$ ; \*\* $p < 0.01$ ; \*\*\* $p < 0.001$

**Supplementary Information Table 2: Robustness Check for Regression of Patients' Fitzpatrick Skin Type on BCD Physicians' Top-3 Accuracy.** Robustness check for top-3 accuracy disparities across skin tone based on alternative inclusion criteria for board-certified dermatologists. This table shows ordinary least squares regressions with robust standard errors clustered on physician participants. The dependent variable is top-1 accuracy. Column (1) includes the first 10 differential diagnoses of images by participants who passed the attention check and completed at least 10 differential diagnoses of images (2) includes the subset of participants from (1) who live in the United States (3) includes the subset of participants from (1) and also includes participants who provided fewer than 10 differential diagnoses of images, and (4) includes all responses of all physician participants who pass the attention check. The coefficients represent the change in the dependent variable for a one-unit change in the independent variable while holding everything else constant. The numbers in parentheses are standard errors indicating the variability of coefficient estimates. \*, \*\*, and \*\*\* indicates the p-value from the ordinary least squares regression is less than 0.05, 0.01, and 0.001.

| <i>Dependent variable: PCP Top-1 Accuracy</i> |                   |                   |                   |                    |
|-----------------------------------------------|-------------------|-------------------|-------------------|--------------------|
|                                               | (1)               | (2)               | (3)               | (4)                |
| Constant                                      | 0.15***<br>(0.01) | 0.16***<br>(0.01) | 0.16***<br>(0.01) | 0.17***<br>(0.01)  |
| Fitzpatrick Skin Type 5 and 6                 | -0.03**<br>(0.01) | -0.05**<br>(0.02) | -0.03**<br>(0.01) | -0.04***<br>(0.01) |
| Observations                                  | 3,150             | 2,052             | 3,352             | 4,999              |
| Number of Primary Care Providers              | 350               | 228               | 434               | 441                |
| Number of Images                              | 363               | 363               | 363               | 363                |
| $R^2$                                         | 0.00              | 0.00              | 0.00              | 0.00               |

*Note:*

\*p<0.05; \*\*p<0.01; \*\*\*p<0.001

**Supplementary Information Table 3: Robustness Check for Regression of Patients' Fitzpatrick Skin Type on PCP Physicians' Top-1 Accuracy.** Robustness check for top-1 accuracy disparities across skin tone based on alternative inclusion criteria for primary care physicians. This table shows ordinary least squares regressions with robust standard errors clustered on physician participants. The dependent variable is top-1 accuracy, and the constant term represents primary care physicians' diagnostic accuracy. Column (1) includes the first 10 differential diagnoses of images by participants who passed the attention check and completed at least 10 differential diagnoses of images (2) includes the subset of participants from (1) who live in the United States (3) includes the subset of participants from (1) and also includes participants who provided fewer than 10 differential diagnoses of images, and (4) includes all responses of all physician participants who pass the attention check. The coefficients represent the change in the dependent variable for a one-unit change in the independent variable while holding everything else constant. The numbers in parentheses are standard errors indicating the variability of coefficient estimates. \*, \*\*, and \*\*\* indicates the p-value from the ordinary least squares regression is less than 0.05, 0.01, and 0.001.

| <i>Dependent variable: PCP Top-3 Accuracy</i> |                   |                   |                   |                    |
|-----------------------------------------------|-------------------|-------------------|-------------------|--------------------|
|                                               | (1)               | (2)               | (3)               | (4)                |
| Constant                                      | 0.20***<br>(0.01) | 0.21***<br>(0.01) | 0.21***<br>(0.01) | 0.21***<br>(0.01)  |
| Fitzpatrick Skin Type 5 and 6                 | -0.04**<br>(0.01) | -0.05**<br>(0.02) | -0.04**<br>(0.01) | -0.05***<br>(0.01) |
| Observations                                  | 3,150             | 2,052             | 3,352             | 4,999              |
| Number of Primary Care Providers              | 350               | 228               | 434               | 441                |
| Number of Images                              | 363               | 363               | 363               | 363                |
| $R^2$                                         | 0.00              | 0.00              | 0.00              | 0.00               |

*Note:*

\*p<0.05; \*\*p<0.01; \*\*\*p<0.001

**Supplementary Information Table 4: Robustness Check for Regression of Patients' Fitzpatrick Skin Type on PCP Physicians' Top-3 Accuracy.** Robustness check for top-3 accuracy disparities across skin tone based on alternative inclusion criteria for primary care physicians. This table shows ordinary least squares regressions with robust standard errors clustered on physician participants. The dependent variable is top-3 accuracy, and the constant term represents primary care physicians' diagnostic accuracy. Column (1) includes the first 10 differential diagnoses of images by participants who passed the attention check and completed at least 10 differential diagnoses of images (2) includes the subset of participants from (1) who live in the United States (3) includes the subset of participants from (1) and also includes participants who provided fewer than 10 differential diagnoses of images, and (4) includes all responses of all physician participants who pass the attention check. The coefficients represent the change in the dependent variable for a one-unit change in the independent variable while holding everything else constant. The numbers in parentheses are standard errors indicating the variability of coefficient estimates. \*, \*\*, and \*\*\* indicates the p-value from the ordinary least squares regression is less than 0.05, 0.01, and 0.001.

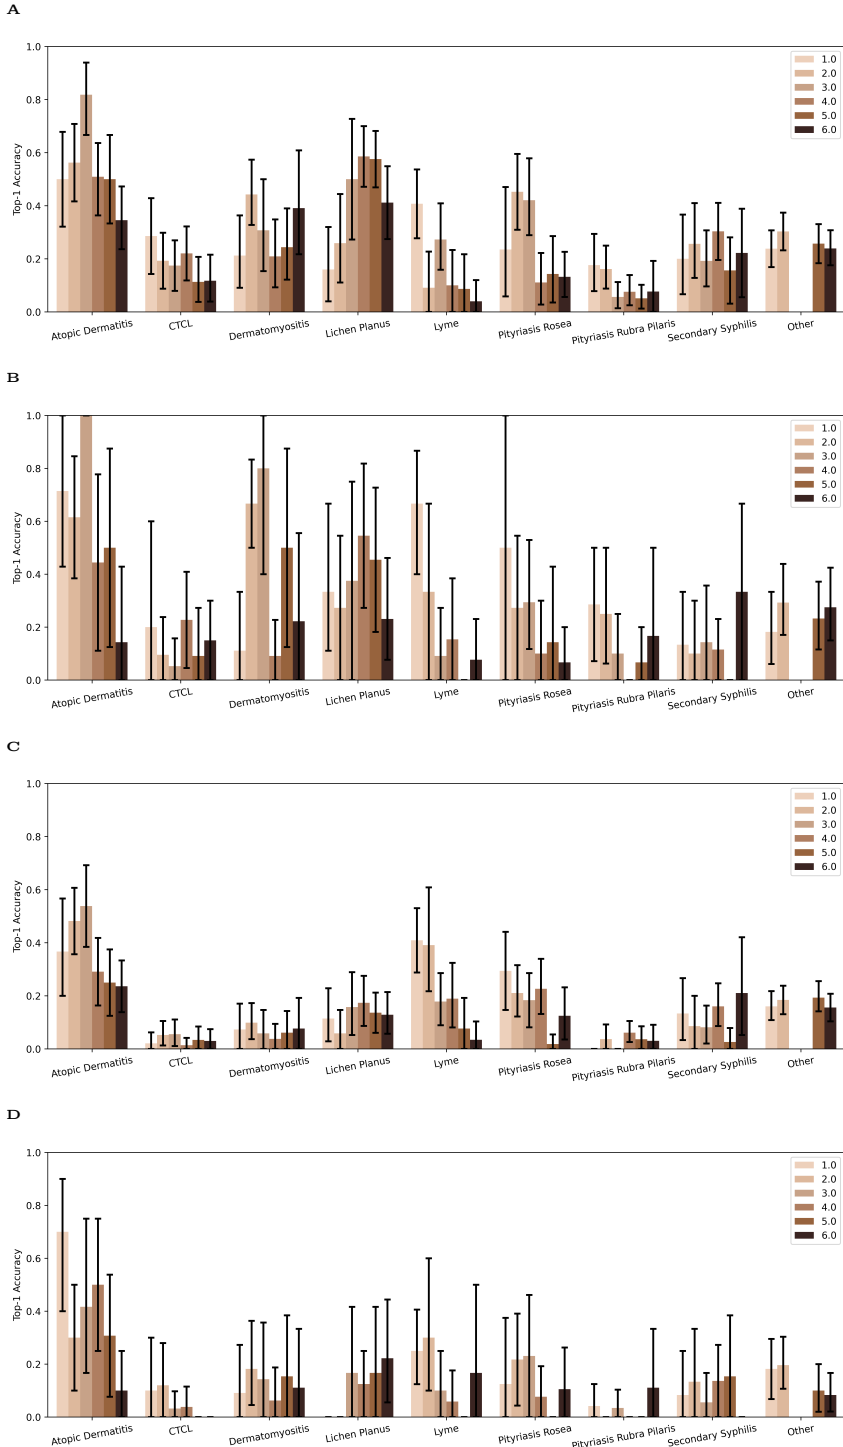

**Supplementary Information Figure 6: Top-1 Diagnostic Accuracy by Physician Type, Skin Disease, and Fitzpatrick Skin Type.** Top-1 accuracy of all physician types (A. BCDs, B. dermatology residents, C. PCPs, D. Other MDs/DOs) across skin diseases and Fitzpatrick skin types. The error bars represent the 95% confidence interval of the true mean.

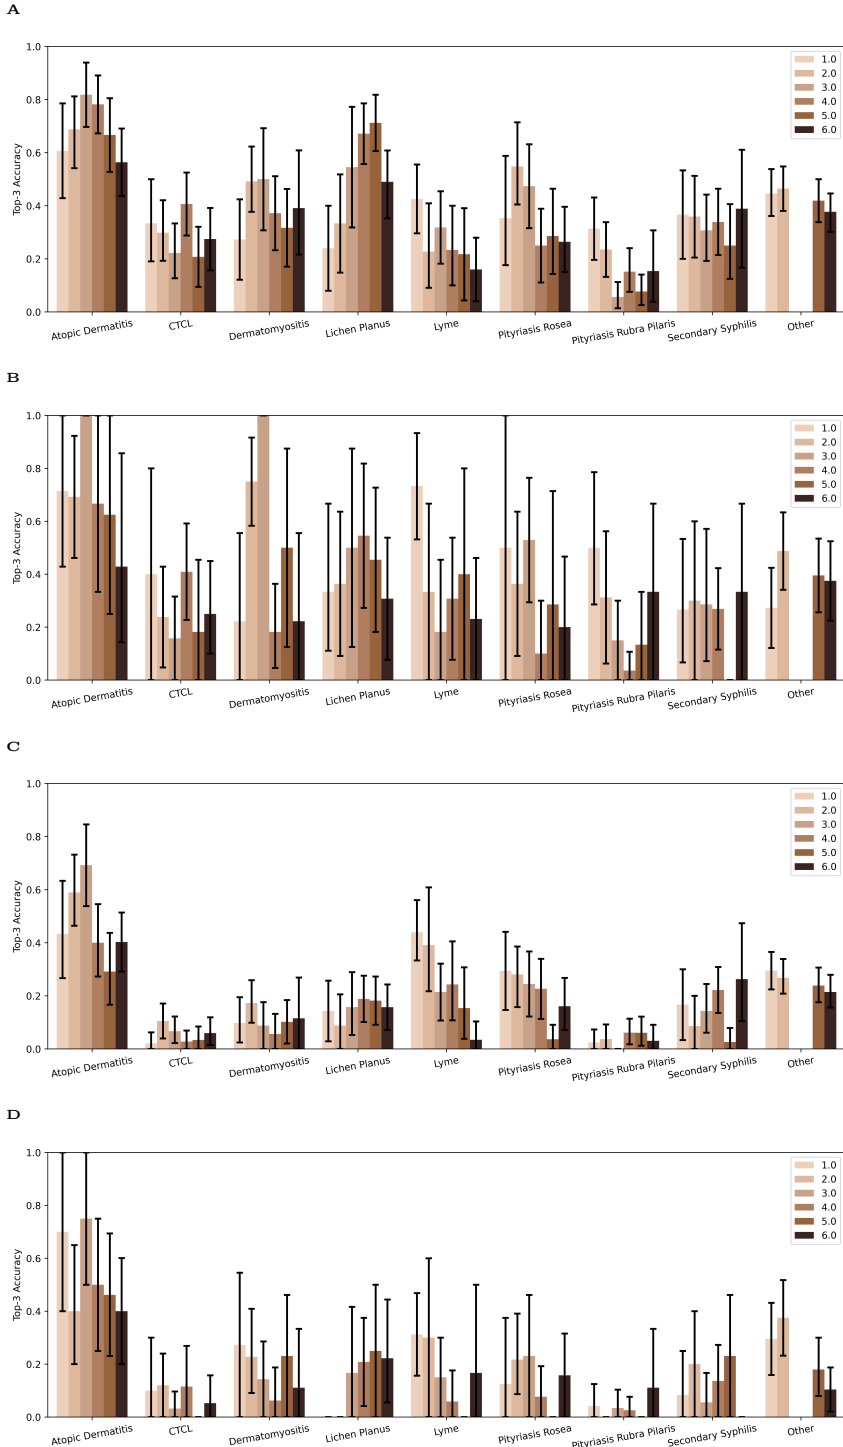

**Supplementary Information Figure 7: Top-3 Diagnostic Accuracy by Physician Type, Skin Disease, and Fitzpatrick Skin Type.** Top-3 accuracy of all physician types (A. BCDs, B. dermatology residents, C. PCPs, D. Other MDs/DOs) across skin diseases and Fitzpatrick skin types. The error bars represent the 95% confidence interval of the true mean.

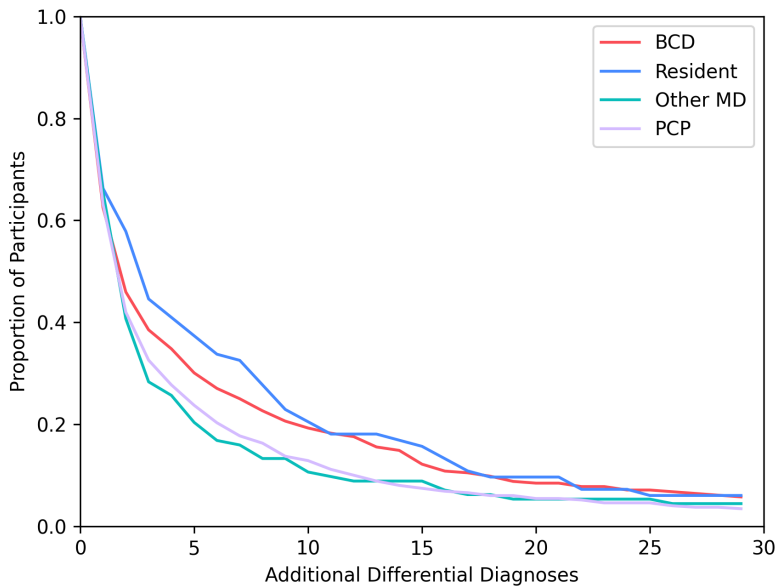

**Supplementary Information Figure 8: Continued Participation after Submitting 10 Sets of Differential Diagnoses.** 63% BCDs, 66% dermatology residents, 65% other physicians, and 63% PCPs continued participating in the experiment after finishing the 10 sets of differential diagnoses that were required for collecting compensation.
